# Supplementary material for: Mental Fatigue Modulates Dynamic Adaptation to Perceptual Demand in Speeded Detection
Source: PubMed Central journal article supplement (PMC3228758; doi:10.1371/journal.pone.0028399), 2011-12-01
Supplement: pone.0028399.s001.pdf [file pone.0028399.s001.pdf]

## Supplementary Material

Table S1

*Performance Measures as a Function of Trial Type and Time on Task, Separately Averaged for Each of the Six Consecutive Time Bins*

| Trial Type         | Reaction Time (ms) |           | Omissions (%) |           | False Alarms (%) |           |
|--------------------|--------------------|-----------|---------------|-----------|------------------|-----------|
|                    | <i>M</i>           | <i>SD</i> | <i>M</i>      | <i>SD</i> | <i>M</i>         | <i>SD</i> |
| Time Bin 1         |                    |           |               |           |                  |           |
| High–High sequence | 229                | 30        | 0.5           | 1.7       | 1.0              | 2.9       |
| Low–High sequence  | 222                | 29        | 0.7           | 2.7       | 2.9              | 5.0       |
| High–Low sequence  | 294                | 31        | 2.6           | 4.5       | 2.4              | 3.5       |
| Low–Low sequence   | 285                | 31        | 0.5           | 1.9       | 1.3              | 2.8       |
| Time Bin 2         |                    |           |               |           |                  |           |
| High–High sequence | 229                | 26        | 0.4           | 1.6       | 1.5              | 2.7       |
| Low–High sequence  | 230                | 30        | 1.0           | 2.1       | 3.1              | 4.1       |
| High–Low sequence  | 297                | 32        | 2.0           | 3.8       | 3.5              | 4.2       |
| Low–Low sequence   | 282                | 26        | 2.0           | 3.2       | 3.5              | 3.8       |
| Time Bin 3         |                    |           |               |           |                  |           |
| High–High sequence | 237                | 30        | 0.7           | 2.2       | 1.4              | 3.0       |
| Low–High sequence  | 232                | 28        | 0.9           | 2.2       | 3.1              | 5.8       |
| High–Low sequence  | 300                | 29        | 3.9           | 6.8       | 3.9              | 6.1       |
| Low–Low sequence   | 287                | 26        | 2.1           | 4.6       | 3.9              | 5.1       |
| Time Bin 4         |                    |           |               |           |                  |           |
| High–High sequence | 237                | 36        | 0.7           | 2.3       | 2.0              | 4.5       |
| Low–High sequence  | 235                | 30        | 0.7           | 2.2       | 2.1              | 3.3       |
| High–Low sequence  | 301                | 26        | 4.6           | 6.2       | 4.9              | 6.1       |
| Low–Low sequence   | 284                | 24        | 2.4           | 3.1       | 4.7              | 5.5       |
| Time Bin 5         |                    |           |               |           |                  |           |
| High–High sequence | 239                | 34        | 1.7           | 3.9       | 2.6              | 4.6       |
| Low–High sequence  | 238                | 33        | 0.6           | 1.8       | 2.0              | 3.0       |
| High–Low sequence  | 311                | 34        | 4.2           | 6.5       | 4.0              | 6.2       |
| Low–Low sequence   | 292                | 32        | 2.6           | 4.6       | 4.0              | 5.6       |

Time Bin 6

|                    |     |    |     |     |     |     |
|--------------------|-----|----|-----|-----|-----|-----|
| High–High sequence | 248 | 39 | 1.7 | 3.2 | 1.5 | 3.2 |
| Low–High sequence  | 244 | 33 | 0.8 | 3.0 | 2.8 | 4.5 |
| High–Low sequence  | 310 | 30 | 4.3 | 5.1 | 5.0 | 6.2 |
| Low–Low sequence   | 291 | 32 | 3.2 | 6.6 | 3.2 | 5.3 |

---

*Note.* High = high intensity (i.e. bright and large stimulus); Low = low intensity (i.e. dim and small stimulus)
